# Supplementary material
Source: HighWire-hosted journal article supplement (https://bjsm.bmj.com/content/51/2/74)
Supplement: inline-supplementary-material-1 [file inline-supplementary-material-1.pdf]

**Online Appendix: Multidisciplinary task force participants**

| Participant                         | Title                                                                                                         | Affiliation/Representation                                                                                                                                                |
|-------------------------------------|---------------------------------------------------------------------------------------------------------------|---------------------------------------------------------------------------------------------------------------------------------------------------------------------------|
| Aaron Baggish, MD, FACC             | Associate Director of the Cardiovascular Performance Program, Massachusetts General Hospital Heart Center.    |                                                                                                                                                                           |
| Rebecca Carl, MD                    | Assistant Professor of Pediatrics, Northwestern University Feinberg School of Medicine                        | <i>Representing:</i> American Academy of Pediatrics’ Council on Sports Medicine and Physical Fitness                                                                      |
| Gordon Cohen, MD                    | Professor & Chair, Pediatric Cardiothoracic Surgery, University of California, San Francisco                  |                                                                                                                                                                           |
| Bob Colgate                         | Director of Sports & Sports Medicine, National Federation of State High School Associations                   |                                                                                                                                                                           |
| Ron Courson, ATC, PT, NREMT-I, CSCS | Director of Sports Medicine, University of Georgia                                                            | <i>Representing:</i> National Athletic Trainers’ Association; College Athletic Trainers’ Society                                                                          |
| Thomas Dompier, PhD, ATC            | President, Datalys Center                                                                                     |                                                                                                                                                                           |
| Jonathan Drezner, MD                | Professor, Family Medicine, and Director, Center for Sports Cardiology, University of Washington Cardiologist | <i>Affiliation:</i> American Medical Society for Sports Medicine<br><i>Representing:</i> American College of Cardiology Sports and Exercise Cardiology Leadership Council |
| Michael Emery, MD, FACC             |                                                                                                               |                                                                                                                                                                           |
| Brian Hainline, MD                  | Chief Medical Officer, NCAA                                                                                   |                                                                                                                                                                           |
| Kimberly Harmon, MD                 | Professor of Family Practice and Head Team Physician, University of Washington                                | <i>Affiliation:</i> American Medical Society for Sports Medicine                                                                                                          |
| William Heinz, MD                   | Chair, Sports Medicine Advisory Committee, National Federation of State High School Associations              | <i>Representing:</i> National Federation of State High School Associations                                                                                                |
| Tim Hosea, MD                       | Team Physician, Rutgers University                                                                            | <i>Representing:</i> American Orthopaedic Society for Sports Medicine                                                                                                     |
| Zack Kerr, PhD                      | Director, NCAA Injury Surveillance Program, Datalys Center                                                    |                                                                                                                                                                           |
| Jarred Koerner                      | Student Athlete                                                                                               | <i>Representing:</i> NCAA Student Athlete Advisory Council                                                                                                                |
| Mitchell Krucoff, MD                | Professor of Medicine, Cardiology, Duke University                                                            |                                                                                                                                                                           |

|                                 |                                                                                            |                                                                                                                                     |
|---------------------------------|--------------------------------------------------------------------------------------------|-------------------------------------------------------------------------------------------------------------------------------------|
| Silvana Molossi, MD, PhD, FACC  | Medical Director, Community and Program Development, Cardiology, Texas Children's Hospital | <i>Representing:</i> American College of Cardiology Sports and Exercise Cardiology Leadership Council                               |
| Patrick Leary, DO               | Clinical Professor of Family Medicine, Lake Erie College of Osteopathic Medicine           | <i>Representing:</i> American Osteopathic Academy of Sports Medicine                                                                |
| Joseph Maleszewski, MD          | Associate Professor of Pathology and Medicine, Mayo Clinic                                 |                                                                                                                                     |
| Valerie Morrow, MD              | Director, Cardiac Safety Research Coalition, Duke University                               |                                                                                                                                     |
| John Parsons, PhD, ATC          | Director, NCAA Sport Science Institute                                                     |                                                                                                                                     |
| Joe Rogowski, ATC, CSCS         | Head Strength and Conditioning Coach, Houston Rockets                                      | <i>Representing:</i> National Strength and Conditioning Association; Collegiate Strength and Conditioning Coaches Association       |
| Herman Saatkamp, PhD            | President, Richard Stockton College                                                        |                                                                                                                                     |
| Eduardo Sanchez, MD, MPH, FAAFP | Chief Medical Officer for Prevention, American Heart Association                           | <i>Representing:</i> American Heart Association                                                                                     |
| David Shipon, MD                | Chief Medical Officer, Simon's Fund                                                        |                                                                                                                                     |
| Andrew Smith, MS, ATC           | Head Athletic Trainer, Canisius College                                                    | <i>Representing:</i> NCAA Committee on Competitive Safeguards and Medical Aspects of Sport; National Athletic Trainers' Association |
| Paul Thompson, MD               | Cardiologist, Hartford Hospital                                                            | <i>Representing:</i> American College of Sports Medicine                                                                            |
| Gary Walters                    | Athletic Director, Princeton University (Retired)                                          |                                                                                                                                     |
| Jim Whitehead, PhD              | Chief Executive Officer, American College of Sports Medicine                               | <i>Representing:</i> American College of Sports Medicine                                                                            |
| Mike Wendinger, ATC             | Head Athletic Trainer, University of Minnesota, Duluth                                     |                                                                                                                                     |
